# Supplementary material
Source: publisher site journal article supplement (https://www.dovepress.com/article/260562)
Supplement: Supplementary file 1 [file get_supplementary_file.php]

**Supplementary Materials: Search strategy**

## **Pubmed History October 6, 2019**

| Search | Query | Items found |
| --- | --- | --- |
| #8 | #7 NOT (("Adolescent"[Mesh] OR "Child"[Mesh] OR "Infant"[Mesh] OR adolescen*[tiab] OR child*[tiab] OR schoolchild*[tiab] OR infant*[tiab] OR girl*[tiab] OR boy*[tiab] OR teen[tiab] OR teens[tiab] OR teenager*[tiab] OR youth*[tiab] OR pediatr*[tiab] OR paediatr*[tiab] OR puber*[tiab]) NOT ("Adult"[Mesh] OR adult*[tiab] OR man[tiab] OR men[tiab] OR woman[tiab] OR women[tiab])) NOT(animals[mh] NOT humans[mh]) NOT (rats[tiab] OR mouse[tiab] OR mice[tiab]) Filters: Publication date from 2007/01/01 | 2259 |
| #7 | #6 NOT (("Adolescent"[Mesh] OR "Child"[Mesh] OR "Infant"[Mesh] OR adolescen*[tiab] OR child*[tiab] OR schoolchild*[tiab] OR infant*[tiab] OR girl*[tiab] OR boy*[tiab] OR teen[tiab] OR teens[tiab] OR teenager*[tiab] OR youth*[tiab] OR pediatr*[tiab] OR paediatr*[tiab] OR puber*[tiab]) NOT ("Adult"[Mesh] OR adult*[tiab] OR man[tiab] OR men[tiab] OR woman[tiab] OR women[tiab])) NOT(animals[mh] NOT humans[mh]) NOT (rats[tiab] OR mouse[tiab] OR mice[tiab]) | 3840 |
| [#6](https://www.ncbi.nlm.nih.gov/pubmed/advanced) | #5 NOT (hormone therap*[ti] OR (hormone[ti] AND use[ti]) OR hormone replacement therap*[ti] OR hormone agonist*[ti] OR hormone receptor*[ti] OR cancer[ti]) | 3960 |
| #5 | #1 AND #2 AND #3 AND #4 | 4002 |
| [#4](https://www.ncbi.nlm.nih.gov/pubmed/advanced) | "Clinical Trial" [Publication Type] OR "Clinical Trials as Topic"[Mesh] OR intervention*[tiab] OR ((random*[tiab] AND (controlled[tiab] OR control[tiab] OR placebo[tiab] OR versus[tiab] OR vs[tiab] OR group[tiab] OR groups[tiab] OR comparison[tiab] OR compared[tiab] OR arm[tiab] OR arms[tiab] OR crossover[tiab] OR cross-over[tiab]) AND (trial[tiab] OR study[tiab])) OR ((single[tiab] OR double[tiab] OR triple[tiab]) AND (masked[tiab] OR blind*[tiab]))) | 2107908 |
| #3 | "Sex"[Mesh] OR "Sex Characteristics"[Mesh] OR "Women"[Mesh] OR "Female"[Mesh] OR "Men"[Mesh] OR "Male"[Mesh] OR gender[tiab] OR woman[tiab] OR women[tiab] OR female*[tiab] OR feminin*[tiab] OR male[tiab] OR males[tiab] OR men[tiab] OR sex characteristic*[tiab] OR sex based[tiab] OR sex factor*[tiab] OR sex distribution[tiab] OR sex difference*[tiab] OR sex dimorphism*[tiab] | 111584134 |
| #2 | “Medication Adherence"[Mesh] OR "Patient Compliance"[Mesh] OR "Medication Therapy Management"[Mesh] OR compliance[tiab] OR noncompliance[tiab] OR non-complicance[tiab] OR adherence[tiab] OR non-adheren*[tiab] OR nonadheren*[tiab] OR persistence[tiab] OR non-persistence[tiab] OR medication therapy management[tiab] | 341756 |
| #1 | "Anticholesteremic Agents"[Mesh] OR "Hydroxymethylglutaryl-CoA Reductase Inhibitors"[Mesh] OR "Hydroxymethylglutaryl-CoA Reductase Inhibitors" [Pharmacological Action] OR "Antihypertensive Agents"[Mesh] OR "Diuretics"[Mesh] OR "Adrenergic beta-Antagonists"[Mesh] OR "Calcium Channel Blockers"[Mesh] OR "Calcium Channel Blockers" [Pharmacological Action] OR "Angiotensin-Converting Enzyme Inhibitors"[Mesh] OR "Angiotensin-Converting Enzyme Inhibitors" [Pharmacological Action] OR "Anticoagulants"[Mesh] OR "Anticoagulants" [Pharmacological Action] OR "Aspirin"[Mesh] OR hyperlipid*[tiab] OR anticholesteremic agent*[tiab] OR hydroxymethylglutaryl-CoA reductase Inhibitor*[tiab] OR HMG CoA reductase inhibitor*[tiab] OR hydroxymethylglutaryl-Coenzyme A Inhibitor*[tiab] OR hypertriglycerid*[tiab] OR lipid lowering[tiab] OR cholesterol lowering[tiab] OR statins[tiab] OR antihypertensive*[tiab] OR anti-hypertensive*[tiab] OR diuretic*[tiab] OR beta block*[tiab] OR adrenergic beta-antagonist*[tiab] OR adrenergic betaantagonist*[tiab] OR beta-adrenergic receptor*[tiab] OR beta adrenergic block*[tiab] OR adrenergic beta-receptor*[tiab] OR calcium channel block*[tiab] OR calcium channel antagonist*[tiab] OR calcium channel drug*[tiab] OR calcium inhibitor*[tiab] OR calcium antagonist*[tiab] OR calcium block*[tiab] OR calcium drug*[tiab] OR angiotensin converting enzyme inhibitor*[tiab] OR angiotensin converting enzyme antagonist*[tiab] OR “angiotensin II”[tiab] OR “angiotensin 2”[tiab] OR ACE inhibitor*[tiab] OR kininase II inhibitor*[tiab] OR angiotensin I converting enzyme inhibitor*[tiab] OR “angiotensin 1”[tiab] OR vasopeptidase inhibitor*[tiab] OR ACE-i[tiab] OR ARB[tiab] OR CCB[tiab] OR BB[tiab] OR blood pressure medic*[tiab] OR blood pressure drug*[tiab] OR anticoagulant*[tiab] OR thrombin inhibitor*[tiab] OR antithrombin*[tiab] OR antithrombotic agent*[tiab] OR antithrombotic drug*[tiab] OR antithrombotic medic*[tiab] OR anti-thrombotic agent*[tiab] OR anti-thrombotic drug*[tiab] OR anti-thrombotic medic*[tiab] OR acetylsalicylic acid*[tiab] OR aspirin[tiab] OR non-vitamin K antagonist*[tiab] OR NOAC[tiab] OR NOAC[tiab] OR TSOACs[tiab] OR dabigatran[tiab] OR rivaroxaban[tiab] OR apixaban[tiab] OR edoxaban[tiab] OR vitamin K antagonist*[tiab] OR renin-angiotensin system agent*[tiab] OR renin-angiotensin system inhibitor*[tiab] OR renin-angiotensin system block*[tiab] | 761926 |

### **Embase History October 6, 2019**

| Search | Query | Items found |
| --- | --- | --- |
| #9 | #8 NOT ('conference abstract'/it OR 'conference review'/it) | 4391 |
| #8 | #6 NOT (('adolescent'/exp OR 'child'/exp OR adolescent*:ti,ab OR child*:ti,ab OR schoolchild*:ti,ab OR infant*:ti,ab OR girl*:ti,ab OR boy*:ti,ab OR teen:ti,ab OR teens:ti,ab OR teenager*:ti,ab OR youth*:ti,ab OR pediatr*:ti,ab OR paediatr*:ti,ab OR puber*:ti,ab) NOT ('adult'/exp OR 'aged'/exp OR 'middle aged'/exp OR adult*:ti,ab OR man:ti,ab OR men:ti,ab OR woman:ti,ab OR women:ti,ab)) NOT ([animals]/lim NOT [humans]/lim) NOT (rats:ab,ti,kw OR mouse:ab,ti,kw OR mice:ab,ti,kw) AND [2007-2019]/py | 5975 |
| #7 | #6 NOT (('adolescent'/exp OR 'child'/exp OR adolescent*:ti,ab OR child*:ti,ab OR schoolchild*:ti,ab OR infant*:ti,ab OR girl*:ti,ab OR boy*:ti,ab OR teen:ti,ab OR teens:ti,ab OR teenager*:ti,ab OR youth*:ti,ab OR pediatr*:ti,ab OR paediatr*:ti,ab OR puber*:ti,ab) NOT ('adult'/exp OR 'aged'/exp OR 'middle aged'/exp OR adult*:ti,ab OR man:ti,ab OR men:ti,ab OR woman:ti,ab OR women:ti,ab)) NOT ([animals]/lim NOT [humans]/lim) NOT (rats:ab,ti,kw OR mouse:ab,ti,kw OR mice:ab,ti,kw) | 7613 |
| [#6](https://www.ncbi.nlm.nih.gov/pubmed/advanced) | #5 NOT ((hormone NEAR/5 (therap* OR use OR agonist* or receptor*)):ti OR cancer:ti) | 7906 |
| #5 | #1 AND #2 AND #3 AND #4 | 8061 |
| [#4](https://www.ncbi.nlm.nih.gov/pubmed/advanced) | 'intervention study'/exp OR 'controlled clinical trial'/exp OR intervention*:ab,ti,kw OR ((random*:ab,ti,kw AND (controlled:ab,ti,kw OR control:ab,ti,kw OR placebo:ab,ti,kw OR versus:ab,ti,kw OR vs:ab,ti,kw OR group:ab,ti,kw OR groups:ab,ti,kw OR comparison:ab,ti,kw OR compared:ab,ti,kw OR arm:ab,ti,kw OR arms:ab,ti,kw OR crossover:ab,ti,kw OR ‘cross-over’:ab,ti,kw) AND (trial:ab,ti,kw OR study:ab,ti,kw)) OR ((single:ab,ti,kw OR double:ab,ti,kw OR triple:ab,ti,kw) AND (masked:ab,ti,kw OR blind*:ab,ti,kw))) | 2383765 |
| #3 | 'gender and sex'/de OR 'gender'/exp OR 'sex'/de OR 'sex difference'/exp OR 'female'/de OR 'male'/de OR gender:ab,ti,kw OR woman:ab,ti,kw OR women:ab,ti,kw OR female*:ab,ti,kw OR feminin*:ab,ti,kw OR male:ab,ti,kw OR males:ab,ti,kw OR men:ab,ti,kw OR ‘sex* characteristic*’:ab,ti,kw OR ‘sex based’:ab,ti,kw OR ‘sex* factor*’:ab,ti,kw OR ‘sex* distribution’:ab,ti,kw OR ‘sex* difference*’:ab,ti,kw OR ‘sex* dimorphism*’:ab,ti,kw | 12457306 |
| #2 | 'patient compliance'/de OR 'medication compliance'/exp OR 'medication therapy management'/exp OR compliance:ab,ti,kw OR noncompliance:ab,ti,kw OR ‘non-complicance’:ab,ti,kw OR adherence:ab,ti,kw OR ‘non-adheren*’:ab,ti,kw OR nonadheren*:ab,ti,kw OR persistence:ab,ti,kw OR ‘non-persistence’:ab,ti,kw OR ‘medication therapy management’:ab,ti,kw | 527083 |
| #1 | 'hypocholesterolemic agent'/exp OR 'hydroxymethylglutaryl coenzyme A reductase inhibitor'/exp OR 'antihypertensive agent'/exp OR 'diuretic agent'/exp OR 'beta adrenergic receptor blocking agent'/exp OR 'calcium channel blocking agent'/exp OR 'dipeptidyl carboxypeptidase inhibitor'/exp OR 'anticoagulant agent'/exp OR 'acetylsalicylic acid'/exp OR 'non vitamin k antagonist'/exp OR 'dabigatran'/exp OR 'rivaroxaban'/exp OR 'apixaban'/exp OR 'edoxaban'/exp OR hyperlipid*:ab,ti,kw OR 'hypocholesterolemic agent*’:ab,ti,kw OR (‘hydroxymethylglutaryl-CoA reductase’ NEAR/3 inhibitor*):ab,ti,kw OR (‘HMG CoA reductase’ NEAR/3 inhibitor*):ab,ti,kw OR (‘hydroxymethylglutaryl-Coenzyme A’ NEAR/3 inhibitor*):ab,ti,kw OR hypertriglycerid*:ab,ti,kw OR ‘lipid lowering’:ab,ti,kw OR ‘cholesterol lowering’:ab,ti,kw OR statins:ab,ti,kw OR antihypertensive*:ab,ti,kw OR ‘anti-hypertensive*’:ab,ti,kw OR diuretic*:ab,ti,kw OR (beta NEAR/3 block*):ab,ti,kw OR ‘adrenergic beta-antagonist*’:ab,ti,kw OR ‘adrenergic betaantagonist*’:ab,ti,kw OR ‘beta-adrenergic receptor*’:ab,ti,kw OR ‘adrenergic beta-receptor*’:ab,ti,kw OR (calcium NEAR/3 block*):ab,ti,kw OR (calcium NEAR/3 antagonist*):ab,ti,kw OR (calcium NEAR/3 drug*):ab,ti,kw OR (calcium NEAR/3 inhibitor*):ab,ti,kw OR (‘angiotensin converting enzyme’ NEAR/3 inhibitor*):ab,ti,kw OR (‘angiotensin converting enzyme’ NEAR/3 antagonist*):ab,ti,kw OR ‘angiotensin II’:ab,ti,kw OR ‘angiotensin 2’:ab,ti,kw OR ‘ACE inhibitor*’:ab,ti,kw OR ‘kininase II inhibitor*’:ab,ti,kw OR (‘angiotensin I converting enzyme’ NEAR/3 inhibitor*):ab,ti,kw OR ‘angiotensin 1’:ab,ti,kw OR (‘dipeptidyl carboxypeptidase’ NEAR/3 inhibitor*):ab,ti,kw OR (vasopeptidase NEAR/3 inhibitor*):ab,ti,kw OR ‘ACE-i’:ab,ti,kw OR ARB:ab,ti,kw OR CCB:ab,ti,kw OR BB:ab,ti,kw OR ‘blood pressure medic*’:ab,ti,kw OR ‘blood pressure drug*’:ab,ti,kw OR anticoagulant*:ab,ti,kw OR (thrombin NEAR/3 inhibitor*):ab,ti,kw OR antithrombin*:ab,ti,kw OR (antithrombotic NEAR/3 agent*):ab,ti,kw OR (antithrombotic NEAR/3 drug*):ab,ti,kw OR (antithrombotic NEAR/3 medic*):ab,ti,kw OR (‘anti-thrombotic’ NEAR/3 drug*):ab,ti,kw OR (‘anti-thrombotic’ NEAR/3 medic*):ab,ti,kw OR ‘acetylsalicylic acid*’:ab,ti,kw OR aspirin:ab,ti,kw OR (‘non-vitamin K’ NEAR/3 antagonist*):ab,ti,kw OR NOAC:ab,ti,kw OR NOAC:ab,ti,kw OR TSOACs:ab,ti,kw OR dabigatran:ab,ti,kw OR rivaroxaban:ab,ti,kw OR apixaban:ab,ti,kw OR edoxaban:ab,ti,kw OR ‘vitamin K antagonist*’:ab,ti,kw OR ('renin-angiotensin system' NEAR/3 agent*):ab,ti,kw OR ('renin-angiotensin system' NEAR/3 inhibitor*):ab,ti,kw OR ('renin-angiotensin system' NEAR/3 block*):ab,ti,kw | 1925877 |

### **The Cochrane Library History October 6, 2019**

| Search | Query | Items found |
| --- | --- | --- |
| #8 | #7 NOT ((adolescent* OR child* OR schoolchild* OR infant* OR girl* OR boy* OR teen OR teens OR teenager* OR youth* OR pediatr* OR paediatr* OR puber*) NOT (adult* OR man OR men OR woman OR women:ti,ab)) NOT (rats OR mouse OR mice):ti,ab,kw | 3005 |
| #7 | #6 not ((hormone near/5 (therap* or use or agonist* or receptor*)) or cancer):ti | 3083 |
| [#6](https://www.ncbi.nlm.nih.gov/pubmed/advanced) | #5 - Publication Year from 2007 to 2019 | 3139 |
| #5 | #1 and #2 and #3 and #4 | 5018 |
| [#4](https://www.ncbi.nlm.nih.gov/pubmed/advanced) | intervention* or ((random* and (controlled or control or placebo or versus or vs or group or groups or comparison or compared or arm or arms or crossover or "cross-over") and (trial or study)) or ((single or double or triple) and (masked or blind*))):ti,ab,kw | 933235 |
| #3 | gender or woman or women or female* or feminin* or male or males or men or (sex* NEAR/3 characteristic*) or (sex NEAR/3 based) or (sex* NEAR/3 factor*) or (sex* NEAR/3 distribution) or (sex* NEAR/3 difference*) or (sex* NEAR/3 dimorphism*):ti,ab,kw | 838187 |
| #2 | compliance or noncompliance or "non-complicance" or adherence or non NEXT adheren* or nonadheren* or persistence or "non-persistence" or "medication therapy management":ti,ab,kw | 99417 |
| #1 | hyperlipid* or (hypocholesterolemic NEAR/3 agent*) or (hydroxymethylglutaryl-CoA NEXT reductase NEAR/3 inhibitor*) or ("HMG CoA reductase" NEAR/3 inhibitor*) or ("hydroxymethylglutaryl-Coenzyme A" NEAR/3 inhibitor*) or hypertriglycerid* or "lipid lowering" or "cholesterol lowering" or statins or antihypertensive* or anti-hypertensive* or diuretic* or (beta NEAR/3 block*) or (adrenergic NEXT beta-antagonist*) or (adrenergic NEXT betaantagonist*) or (beta NEXT adrenergic NEXT receptor*) or (adrenergic NEXT beta-receptor*) or (calcium NEAR/3 block*) or (calcium NEAR/3 antagonist*) or (calcium NEAR/3 drug*) or (calcium NEAR/3 inhibitor*) or ("angiotensin converting enzyme" NEAR/3 inhibitor*) or ("angiotensin converting enzyme" NEAR/3 antagonist*) or "angiotensin II" or "angiotensin 2" or (ACE NEAR/3 inhibitor*) or ("kininase I" NEAR/3 inhibitor*) or ("angiotensin I converting enzyme" NEAR/3 inhibitor*) or "angiotensin 1" or ("dipeptidyl carboxypeptidase" NEAR/3 inhibitor*) or (vasopeptidase NEAR/3 inhibitor*) or "ACE-i" or ARB or CCB or BB or ("blood pressure" NEAR/3 medic*) or ("blood pressure" NEAR/3 drug*) or anticoagulant* or (thrombin NEAR/3 inhibitor*) or antithrombin* or (antithrombotic NEAR/3 agent*) or (antithrombotic NEAR/3 drug*) or (antithrombotic NEAR/3 medic*) or ("anti-thrombotic" NEAR/3 drug*) or ("anti-thrombotic" NEAR/3 medic*) or (acetylsalicylic NEXT acid*) or aspirin or ("non-vitamin K" NEAR/3 antagonist*) or NOAC or NOAC or TSOACs or dabigatran or rivaroxaban or apixaban or edoxaban or (vitamin-K NEXT antagonist*) or ("renin-angiotensin system" NEAR/3 agent*) or ("renin-angiotensin system" NEAR/3 inhibitor*) or ("renin-angiotensin system" NEAR/3 block*):ti,ab,kw | 101944 |

### **PsycINFO (Ebsco) History October 6, 2019**

| Search | Query | Items found |
| --- | --- | --- |
| S5 | S2 AND S2 AND S4 Published Date: 20070101-20191231 | 256 |
| S4 | S1 AND S2 AND S3 | 322 |
| S3 | DE ("Intervention" OR "Clinical Trials") OR TI (intervention* OR ((random* AND (controlled OR control OR placebo OR versus OR vs OR group OR groups OR comparison OR compared OR arm OR arms OR crossover OR "cross-over") AND (trial OR study)) OR ((single OR double OR triple) AND (masked OR blind*))) OR AB (intervention* OR ((random* AND (controlled OR control OR placebo OR versus OR vs OR group OR groups OR comparison OR compared OR arm OR arms OR crossover OR “cross-over”) AND (trial OR study)) OR ((single OR double OR triple) AND (masked OR blind*))) OR KW (intervention* OR ((random* AND (controlled OR control OR placebo OR versus OR vs OR group OR groups OR comparison OR compared OR arm OR arms OR crossover OR “cross-over”) AND (trial OR study)) OR ((single OR double OR triple) AND (masked OR blind*))) | 471245 |
| S2 | DE ("Compliance" OR "Treatment Compliance") OR TI (compliance OR noncompliance OR “non-complicance” OR adherence OR “non-adheren*” OR nonadheren* OR persistence OR “non-persistence” OR “medication therapy management”) OR AB (compliance OR noncompliance OR “non-complicance” OR adherence OR “non-adheren*” OR nonadheren* OR persistence OR “non-persistence” OR “medication therapy management”) OR KW (compliance OR noncompliance OR “non-complicance” OR adherence OR “non-adheren*” OR nonadheren* OR persistence OR “non-persistence” OR “medication therapy management”) | 74913 |
| S1 | DE ("Anticoagulant Drugs" OR "Heparin" OR "Antihypertensive Drugs" OR "Alpha Methylparatyrosine" OR "Captopril" OR "Chlorpromazine" OR "Clonidine" OR "Guanethidine" OR "Hexamethonium" OR "Hydralazine" OR "Iproniazid" OR "Mecamylamine" OR "Methyldopa" OR "Pargyline" OR "Pheniprazine" OR "Phenoxybenzamine" OR "Quinpirole" OR "Reserpine" OR "Adrenergic Blocking Drugs" OR "Alpha Methylparatyrosine" OR "Dihydroergotamine" OR "Hydroxydopamine (6-)" OR "Phenoxybenzamine" OR "Propranolol" OR "Yohimbine" OR "Diuretics" OR "Acetazolamide" OR "Ethacrynic Acid" OR "Theophylline" OR "Channel Blockers" OR "Statins" OR "Aspirin") OR TI (hyperlipid* OR (hypocholesterolemic N3 agent*) OR (“hydroxymethylglutaryl-CoA reductase” N3 inhibitor*) OR (“HMG CoA reductase” N3 inhibitor*) OR (“hydroxymethylglutaryl-Coenzyme A” N3 inhibitor*) OR hypertriglycerid* OR “lipid lowering” OR “cholesterol lowering” OR statins OR antihypertensive* OR anti-hypertensive* OR diuretic* OR (beta N3 block*) OR “adrenergic beta-antagonist*” OR “adrenergic betaantagonist*” OR “beta-adrenergic receptor*” OR “adrenergic beta-receptor*” OR (calcium N3 block*) OR (calcium N3 antagonist*) OR (calcium N3 drug*) OR (calcium N3 inhibitor*) OR (“angiotensin converting enzyme” N3 inhibitor*) OR (“angiotensin converting enzyme” N3 antagonist*) OR “angiotensin II” OR “angiotensin 2” OR (ACE N3 inhibitor*) OR (“kininase I” N3 inhibitor*) OR (“angiotensin I converting enzyme” N3 inhibitor*) OR “angiotensin 1” OR (“dipeptidyl carboxypeptidase” N3 inhibitor*) OR (vasopeptidase N3 inhibitor*) OR “ACE-i” OR ARB OR CCB OR BB OR (“blood pressure” N3 medic*) OR (“blood pressure” N3 drug*) OR anticoagulant* OR (thrombin N3 inhibitor*) OR antithrombin* OR (antithrombotic N3 agent*) OR (antithrombotic N3 drug*) OR (antithrombotic N3 medic*) OR (“anti-thrombotic” N3 drug*) OR (“anti-thrombotic” N3 medic*) OR “acetylsalicylic acid*” OR aspirin OR (“non-vitamin K” N3 antagonist*) OR NOAC OR NOAC OR TSOACs OR dabigatran OR rivaroxaban OR apixaban OR edoxaban OR “vitamin K antagonist*” OR (“renin-angiotensin system” N3 agent*) OR (“renin-angiotensin system” N3 inhibitor*) OR (“renin-angiotensin system” N3 block*)) OR AB (hyperlipid* OR (hypocholesterolemic N3 agent*) OR (“hydroxymethylglutaryl-CoA reductase” N3 inhibitor*) OR (“HMG CoA reductase” N3 inhibitor*) OR (“hydroxymethylglutaryl-Coenzyme A” N3 inhibitor*) OR hypertriglycerid* OR “lipid lowering” OR “cholesterol lowering” OR statins OR antihypertensive* OR anti-hypertensive* OR diuretic* OR (beta N3 block*) OR “adrenergic beta-antagonist*” OR “adrenergic betaantagonist*” OR “beta-adrenergic receptor*” OR “adrenergic beta-receptor*” OR (calcium N3 block*) OR (calcium N3 antagonist*) OR (calcium N3 drug*) OR (calcium N3 inhibitor*) OR (“angiotensin converting enzyme” N3 inhibitor*) OR (“angiotensin converting enzyme” N3 antagonist*) OR “angiotensin II” OR “angiotensin 2” OR (ACE N3 inhibitor*) OR (“kininase I” N3 inhibitor*) OR (“angiotensin I converting enzyme” N3 inhibitor*) OR “angiotensin 1” OR (“dipeptidyl carboxypeptidase” N3 inhibitor*) OR (vasopeptidase N3 inhibitor*) OR “ACE-i” OR ARB OR CCB OR BB OR (“blood pressure” N3 medic*) OR (“blood pressure” N3 drug*) OR anticoagulant* OR (thrombin N3 inhibitor*) OR antithrombin* OR (antithrombotic N3 agent*) OR (antithrombotic N3 drug*) OR (antithrombotic N3 medic*) OR (“anti-thrombotic” N3 drug*) OR (“anti-thrombotic” N3 medic*) OR “acetylsalicylic acid*” OR aspirin OR (“non-vitamin K” N3 antagonist*) OR NOAC OR NOAC OR TSOACs OR dabigatran OR rivaroxaban OR apixaban OR edoxaban OR “vitamin K antagonist*” OR (“renin-angiotensin system” N3 agent*) OR (“renin-angiotensin system” N3 inhibitor*) OR (“renin-angiotensin system” N3 block*)) OR KW (hyperlipid* OR (hypocholesterolemic N3 agent*) OR (“hydroxymethylglutaryl-CoA reductase” N3 inhibitor*) OR (“HMG CoA reductase” N3 inhibitor*) OR (“hydroxymethylglutaryl-Coenzyme A” N3 inhibitor*) OR hypertriglycerid* OR “lipid lowering” OR “cholesterol lowering” OR statins OR antihypertensive* OR anti-hypertensive* OR diuretic* OR (beta N3 block*) OR “adrenergic beta-antagonist*” OR “adrenergic betaantagonist*” OR “beta-adrenergic receptor*” OR “adrenergic beta-receptor*” OR (calcium N3 block*) OR (calcium N3 antagonist*) OR (calcium N3 drug*) OR (calcium N3 inhibitor*) OR (“angiotensin converting enzyme” N3 inhibitor*) OR (“angiotensin converting enzyme” N3 antagonist*) OR “angiotensin II” OR “angiotensin 2” OR (ACE N3 inhibitor*) OR (“kininase I” N3 inhibitor*) OR (“angiotensin I converting enzyme” N3 inhibitor*) OR “angiotensin 1” OR (“dipeptidyl carboxypeptidase” N3 inhibitor*) OR (vasopeptidase N3 inhibitor*) OR “ACE-i” OR ARB OR CCB OR BB OR (“blood pressure” N3 medic*) OR (“blood pressure” N3 drug*) OR anticoagulant* OR (thrombin N3 inhibitor*) OR antithrombin* OR (antithrombotic N3 agent*) OR (antithrombotic N3 drug*) OR (antithrombotic N3 medic*) OR (“anti-thrombotic” N3 drug*) OR (“anti-thrombotic” N3 medic*) OR “acetylsalicylic acid*” OR aspirin OR (“non-vitamin K” N3 antagonist*) OR NOAC OR NOAC OR TSOACs OR dabigatran OR rivaroxaban OR apixaban OR edoxaban OR “vitamin K antagonist*” OR (“renin-angiotensin system” N3 agent*) OR (“renin-angiotensin system” N3 inhibitor*) OR (“renin-angiotensin system” N3 block*)) | 25239 |

### **Cinahl (Ebsco) History October 6, 2019**

| Search | Query | Items found |
| --- | --- | --- |
| S6 | S1 AND S2 AND S3 AND S4 Publication Date: 20070101-20191231 | 665 |
| S5 | S1 AND S2 AND S3 AND S4 | 838 |
| S4 | MH ("Clinical Trials+" ) OR TI (intervention* OR ((random* AND (controlled OR control OR placebo OR versus OR vs OR group OR groups OR comparison OR compared OR arm OR arms OR crossover OR “cross-over”) AND (trial OR study)) OR ((single OR double OR triple) AND (masked OR blind*))) OR AB (intervention* OR ((random* AND (controlled OR control OR placebo OR versus OR vs OR group OR groups OR comparison OR compared OR arm OR arms OR crossover OR “cross-over”) AND (trial OR study)) OR ((single OR double OR triple) AND (masked OR blind*))) | 692170 |
| S3 | MH ("Sex Factors" OR "Female" OR "Male" OR "Women+" OR "Men+") OR TI (gender OR woman OR women OR female* OR feminin* OR male OR males OR men OR sex* characteristic* OR sex based OR sex* factor* OR sex* distribution OR sex* difference* OR sex* dimorphism*) OR AB (gender OR woman OR women OR female* OR feminin* OR male OR males OR men OR sex* characteristic* OR sex based OR sex* factor* OR sex* distribution OR sex* difference* OR sex* dimorphism*) | 2208625 |
| S2 | (MH "Patient Compliance+") OR TI (compliance OR noncompliance OR “non-complicance” OR adherence OR “non-adheren*” OR nonadheren* OR persistence OR “non-persistence” OR “medication therapy management”) OR AB (compliance OR noncompliance OR “non-complicance” OR adherence OR “non-adheren*” OR nonadheren* OR persistence OR “non-persistence” OR “medication therapy management”) | 104735 |
| S1 | MH ("Statins+" OR "Antilipemic Agents+" OR "Antihypertensive Agents+" OR "Diuretics+" OR "Adrenergic Beta-Antagonists+" OR "Calcium Channel Blockers+" OR "Angiotensin II Type I Receptor Blockers+" OR "Anticoagulants+" OR "Aspirin" OR "Dabigatran Etexilate" OR "Rivaroxaban") OR TI (hyperlipid* OR (hypocholesterolemic N3 agent*) OR (“hydroxymethylglutaryl-CoA reductase” N3 inhibitor*) OR (“HMG CoA reductase” N3 inhibitor*) OR (“hydroxymethylglutaryl-Coenzyme A” N3 inhibitor*) OR hypertriglycerid* OR “lipid lowering” OR “cholesterol lowering” OR statins OR antihypertensive* OR anti-hypertensive* OR diuretic* OR (beta N3 block*) OR “adrenergic beta-antagonist*” OR “adrenergic betaantagonist*” OR “beta-adrenergic receptor*” OR “adrenergic beta-receptor*” OR (calcium N3 block*) OR (calcium N3 antagonist*) OR (calcium N3 drug*) OR (calcium N3 inhibitor*) OR (“angiotensin converting enzyme” N3 inhibitor*) OR (“angiotensin converting enzyme” N3 antagonist*) OR “angiotensin II” OR “angiotensin 2” OR (ACE N3 inhibitor*) OR (“kininase I” N3 inhibitor*) OR (“angiotensin I converting enzyme” N3 inhibitor*) OR “angiotensin 1” OR ““dipeptidyl carboxypeptidase inhibitor*” OR (vasopeptidase N3 inhibitor*) OR “ACE-i” OR ARB OR CCB OR BB OR (“blood pressure” N3 medic*) OR (“blood pressure” N3 drug*) OR anticoagulant* OR (thrombin N3 inhibitor*) OR antithrombin* OR (antithrombotic N3 agent*) OR (antithrombotic N3 drug*) OR (antithrombotic N3 medic*) OR (“anti-thrombotic” N3 drug*) OR (“anti-thrombotic” N3 medic*) OR “acetylsalicylic acid*” OR aspirin OR (“non-vitamin K” N3 antagonist*) OR NOAC OR NOAC OR TSOACs OR dabigatran OR rivaroxaban OR apixaban OR edoxaban OR “vitamin K antagonist*” OR (“renin-angiotensin system” N3 agent*) OR (“renin-angiotensin system” N3 inhibitor*) OR (“renin-angiotensin system” N3 block*)) OR AB (hyperlipid* OR (hypocholesterolemic N3 agent*) OR (“hydroxymethylglutaryl-CoA reductase” N3 inhibitor*) OR (“HMG CoA reductase” N3 inhibitor*) OR (“hydroxymethylglutaryl-Coenzyme A” N3 inhibitor*) OR hypertriglycerid* OR “lipid lowering” OR “cholesterol lowering” OR statins OR antihypertensive* OR anti-hypertensive* OR diuretic* OR (beta N3 block*) OR “adrenergic beta-antagonist*” OR “adrenergic betaantagonist*” OR “beta-adrenergic receptor*” OR “adrenergic beta-receptor*” OR (calcium N3 block*) OR (calcium N3 antagonist*) OR (calcium N3 drug*) OR (calcium N3 inhibitor*) OR (“angiotensin converting enzyme” N3 inhibitor*) OR (“angiotensin converting enzyme” N3 antagonist*) OR “angiotensin II” OR “angiotensin 2” OR (ACE N3 inhibitor*) OR (“kininase I” N3 inhibitor*) OR (“angiotensin I converting enzyme” N3 inhibitor*) OR “angiotensin 1” OR ““dipeptidyl carboxypeptidase inhibitor*” OR (vasopeptidase N3 inhibitor*) OR “ACE-i” OR ARB OR CCB OR BB OR (“blood pressure” N3 medic*) OR (“blood pressure” N3 drug*) OR anticoagulant* OR (thrombin N3 inhibitor*) OR antithrombin* OR (antithrombotic N3 agent*) OR (antithrombotic N3 drug*) OR (antithrombotic N3 medic*) OR (“anti-thrombotic” N3 drug*) OR (“anti-thrombotic” N3 medic*) OR “acetylsalicylic acid*” OR aspirin OR (“non-vitamin K” N3 antagonist*) OR NOAC OR NOAC OR TSOACs OR dabigatran OR rivaroxaban OR apixaban OR edoxaban OR “vitamin K antagonist*” OR (“renin-angiotensin system” N3 agent*) OR (“renin-angiotensin system” N3 inhibitor*) OR (“renin-angiotensin system” N3 block*)) | 98008 |
